# Supplementary material
Source: publisher site journal article supplement (https://www.dovepress.com/article/290074)
Supplement: Supplementary file 1 [file get_supplementary_file.php]

## Supplementary file

**Table S1: The English version questionnaire**

### I. Socio-demographic related question

| S.no | Questions                                                                 | Categories                                                                                                                            | Remarks                           |
|------|---------------------------------------------------------------------------|---------------------------------------------------------------------------------------------------------------------------------------|-----------------------------------|
| 1.   | Sex?                                                                      | 1. Male<br>2. female                                                                                                                  |                                   |
| 2.   | Age                                                                       | .....                                                                                                                                 |                                   |
| 3.   | Marital status                                                            | 1. Single<br>2. Married<br>3. Divorced<br>4. Separated<br>5. Widowed                                                                  |                                   |
| 4.   | Religion                                                                  | 1. Orthodox Christian<br>2. Muslim<br>3. Protestant<br>4. Catholic<br>5. Others                                                       |                                   |
| 5.   | Level of education?                                                       | 1. Diploma Nurse<br>2. BSC Nurse<br>3. MSC and above                                                                                  |                                   |
| 6.   | Which ward are you currently giving service?                              | 1. Emergency ward<br>2. ICU ward<br>3. Surgical ward<br>4. Medical ward<br>5. OPD<br>6. Pediatrics ward<br>7. Other<br>(specify)_____ |                                   |
| 7.   | Total years of working experiences as a nurse, in month/years             | _____                                                                                                                                 |                                   |
| 8.   | Years of working experiences in the current working unite in month/years? | _____                                                                                                                                 |                                   |
| 9.   | Have ever take training about pre-hospital and emergency care             | 1. Yes<br>2. no                                                                                                                       | If no skip to knowledge questions |
| 10.  | If yes for question no.9 specify types of training you have taken         |                                                                                                                                       |                                   |

## II. Knowledge questions

| S.no | Questions                                                                                                                                           | Yes(1) | No (0) |
|------|-----------------------------------------------------------------------------------------------------------------------------------------------------|--------|--------|
| 1.   | Do you hear about pre-hospital emergency care during undergraduate?                                                                                 |        |        |
| 2.   | Do you take courses/training about pre-hospital emergency care after the completion of your education?                                              |        |        |
| 3.   | Do you know about basic life Support/Advanced Life Support                                                                                          |        |        |
| 4.   | Do you know how CPR (Cardio-Pulmonary Resuscitation) is performed                                                                                   |        |        |
| 5.   | Do you know about RTS (Revised Trauma Scale) for prognosis of injury patients?                                                                      |        |        |
| 6.   | Do you know training related to aspects of Pre-hospital emergency nursing care?                                                                     |        |        |
| 7.   | Do you know the recommended methods of transportation of emergency cases according to the distance between site of trauma and health care facility? |        |        |
| 8.   | Do you know the components of pre-hospital emergency ambulance carry?                                                                               |        |        |
| 9.   | Do you know how you can independently manage an emergency patient?                                                                                  |        |        |
| 10.  | Do you know the ways you respond if you get suspected acute Myocardial Infarction?                                                                  |        |        |

### III. Practice equations

| <b>S.<br/>no</b> | <b>Questions</b>                                                                                        | <b>Yes<br/>(1)</b> | <b>No<br/>(0)</b> |
|------------------|---------------------------------------------------------------------------------------------------------|--------------------|-------------------|
| 1.               | Do you give adequate basic life support (BLS) for patients come to your hospitals/clinics by ambulance? |                    |                   |
| 2.               | Do you provide cardio-pulmonary resuscitation (CPR) to patients?                                        |                    |                   |
| 3.               | Do you attend lectures /courses/seminars about pre-hospital management/emergency and critical care      |                    |                   |
| 4.               | Do you confidently deliver A B C D E in the care of emergency patient?                                  |                    |                   |
| 5.               | Do you use protocols and algorithms to trauma/emergency patient management?                             |                    |                   |
| 6.               | Do you have basic life support equipments (mucous extractor, Ambu Bag, mouth-to-mouth airway) with you? |                    |                   |
| 7.               | Is your staff sent to emergency medical service (EMS) training camp?                                    |                    |                   |
| 8.               | Is there a mismanagement in regard to pre-hospital emergency care in your work area                     |                    |                   |
| 9.               | Is CATS (Centralized Accident and Trauma Services) started and effective?                               |                    |                   |
| 10.              | Do you present on an accident site and participated in managing?                                        |                    |                   |
